# Supplementary material for: CT-M8 Mice: A New Mouse Model Demonstrates That Basophils Have a Nonredundant Role in Lupus-Like Disease Development
Source: PubMed Central journal article supplement (PMC9277511; doi:10.3389/fimmu.2022.900532), 2022-06-29
Supplement: DataSheet_1.pdf [file DataSheet_1.pdf]

**CT-M8 mice: a new mouse model demonstrates that basophils have a non-redundant role in lupus-like disease development**

**SUPPLEMENTARY MATERIAL**

**Authors:** John TCHEN <sup>1,2</sup>, Quentin SIMON <sup>1,2</sup>, Léa CHAPART <sup>1,2</sup>, Christophe PELLEFIGUES <sup>1,2</sup>, Hajime KARASUYAMA <sup>3</sup>, Kensuke MIYAKE <sup>3</sup>, Ulrich BLANK <sup>1,2</sup>, Marc BENHAMOU <sup>1,2</sup>, Eric DAUGAS <sup>1,2,4</sup>, Nicolas CHARLES <sup>1,2</sup>

**Affiliations:**

1- Université Paris Cité, Centre de Recherche sur l'Inflammation, INSERM UMR1149, CNRS EMR8252, Faculté de Médecine site Bichat, Paris, France

2- Université Paris Cité, Laboratoire d'Excellence INFLAMEX, Paris, France

3- Department of Immune Regulation, Graduate School of Medical and Dental Sciences, Tokyo Medical and Dental University (TMDU), Tokyo, Japan

4- Service de Néphrologie, Hôpital Bichat, Assistance Publique – Hôpitaux de Paris, Paris, France

**\*Correspondence to:**

Nicolas Charles, PhD

Centre de Recherche sur l'Inflammation, INSERM UMR1149, CNRS ERL8252,

Université Paris Cité, Faculté de Médecine site Bichat,

16 rue Henri Huchard, 75018 Paris, France.

Phone: +33 157277306

E-mail: [nicolas.charles@inserm.fr](mailto:nicolas.charles@inserm.fr)

Supplementary Figure S1 :

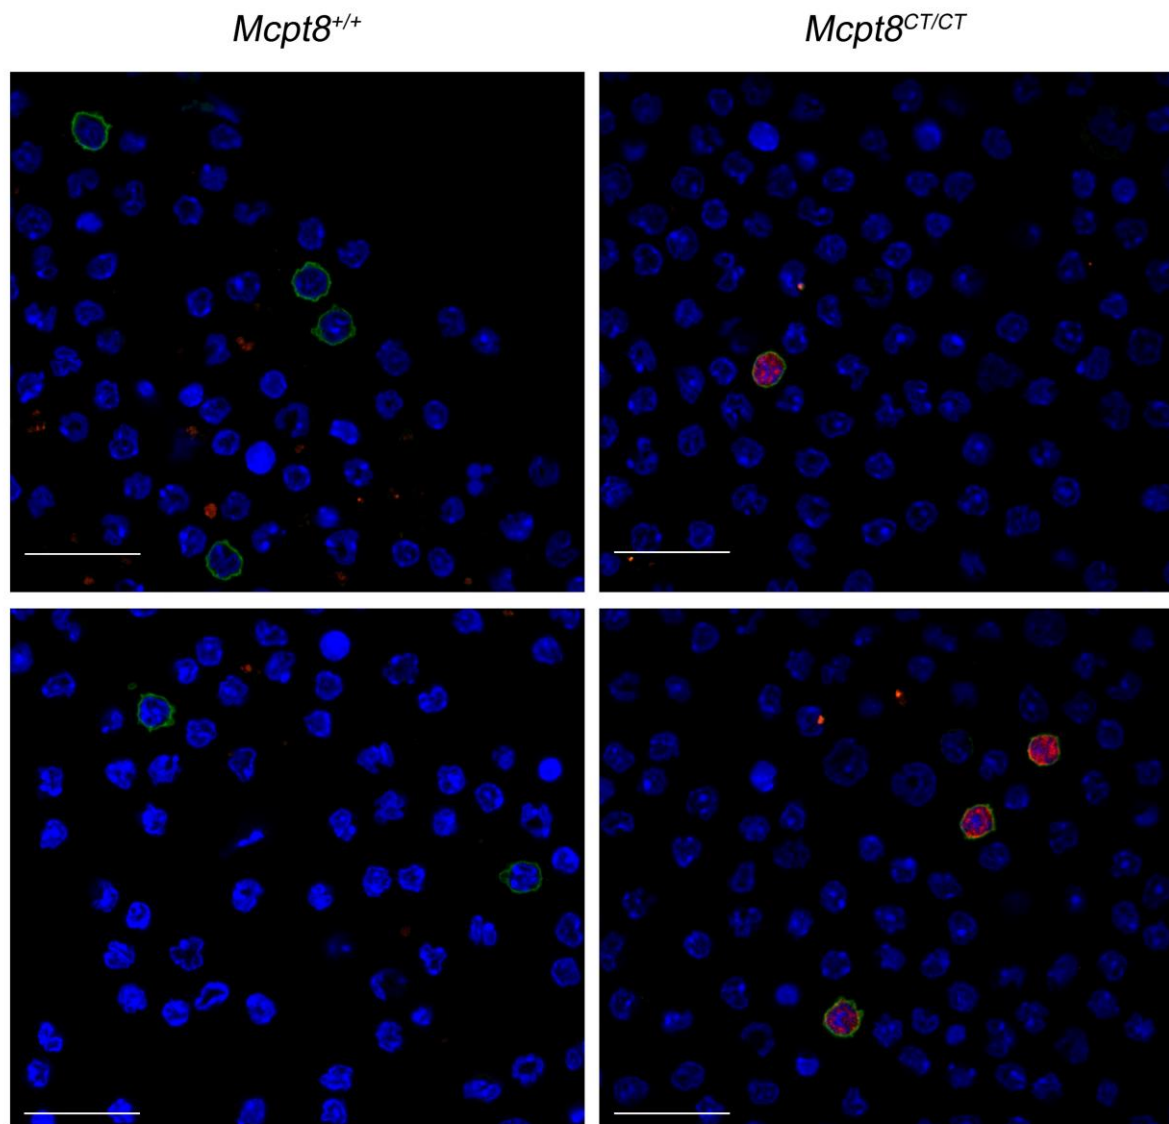

**Supplementary Figure S1: tdTomato expression in basophils from CT-M8 mice**

Basophil-specific tdTomato expression (red) imaged by confocal microscopy on basophil-enriched splenocytes from *Mcpt8<sup>+/+</sup>* (left) and *Mcpt8<sup>CT/CT</sup>* (right) mice stained with anti-IgE antibody (green) and DNA staining (DAPI, blue) (see **methods**). Scale bar = 20  $\mu$ m. The upper panels correspond to the uncropped images from **Figure 1C**. The lower panels are from another independent experiment.
